# Supplementary material for: Evaluation of ERA5, MERRA-2, COSMO-REA6, NEWA and AROME to simulate wind power production over France
Source: Copernicus journal article supplement (doi:10.5194/asr-17-63-2020), 2020-06-16
Supplement: Supplementary file [file asr-17-63-2020-supplement-title-page.pdf › asr-17-63-2020-supplement-title-page.pdf]

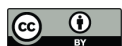

## *Supplement of*

# **Evaluation of ERA5, MERRA-2, COSMO-REA6, NEWA and AROME to simulate wind power production over France**

**Bénédicte Jourdier**

*Correspondence to:* Bénédicte Jourdier (bjourdier@melix.net)

- [asr-17-63-2020-supplement-title-page.pdf](#)
- [supplement](#)
  - [FR\\_Enedis\\_Annual\\_MWh.csv](#)
  - [FR\\_RTE\\_Prod30T\\_MW.csv](#)
  - [FR\\_WindFarmsInfo.csv](#)
  - [README.txt](#)

The copyright of individual parts of the supplement might differ from the CC BY 4.0 License.
